# Supplementary material for: ESR1 NAPA Assay: Development and Analytical Validation of a Highly Sensitive and Specific Blood-Based Assay for the Detection of ESR1 Mutations in Liquid Biopsies
Source: MDPI journal article supplement (doi:10.3390/cancers13030556), 2021-02-01
Supplement: s1 [file s1]

SupplementaryMaterials:

## ***ESR1* NAPA Assay: Development and Analytical Validation of a Highly Sensitive and Specific Blood-Based Assay for the Detection of *ESR1* Mutations in Liquid Biopsies**

Dimitra Stergiopoulou, Athina Markou, Eleni Tzanikou, Ioannis Ladas, G. Mike Makrigiorgos, Vassilis Georgoulas and Evi Lianidou

**Supplementary Table S1.** Day to day reproducibility of the *ESR1* NAPA assay using synthetic oligos for each mutation ( $n = 7$ ).

| <i>ESR1</i> mutation,<br>(MAF: 9%) | T <sub>m</sub> (°C) | CV%   |
|------------------------------------|---------------------|-------|
| Y537S                              | 85.51±0.40          | 0.47% |
| Y537C                              | 85.59±0.14          | 0.16% |
| Y537N                              | 85.82±0.10          | 0.12% |
| D538G                              | 85.58±0.19          | 0.23% |

\*: MAF: Mutation Allele Frequency
